# Supplementary material
Source: Springer Nature journal article supplement (https://www.springermedizin.de/resource/supplementary/12958_2013_1147_MOESM1_ESM.pdf/9566888)

# p160 ROCK-1

$\beta$ -actin normalised densitometric units

1.25  
1.00  
0.75  
0.50  
0.25  
0.00

Normal  
*n* = 15

Obese  
*n* = 22

\*\*\*

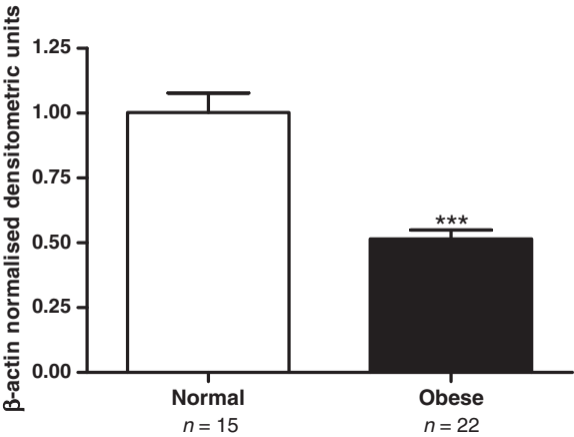

Supplement: MOESM1 [file 9566888]
